# Supplementary material for: Lycopene alleviates hepatic ischemia reperfusion injury via the Nrf2/HO-1 pathway mediated NLRP3 inflammasome inhibition in Kupffer cells
Source: PubMed Central journal article supplement — Ann Transl Med. 2021 Apr;9(8):631. doi: 10.21037/atm-20-7084 (PMC8106004; doi:10.21037/atm-20-7084), 2021-04
Supplement: atm-09-08-631-supplementary.pdf [file atm-09-08-631-supplementary.pdf]

## Primer sequences for the amplification:

| Gene          | Forward primer (5' → 3')        | Reverse primer (5' → 3')       |
|---------------|---------------------------------|--------------------------------|
| TNF- $\alpha$ | 5'-GCCTCTTCTCATTCTGCTTGT-3'     | 5'-GATGATCTGAGTGTGAGGGTCTG-3'  |
| IL-1 $\beta$  | 5'-GCAACTGTTCTGAACTCAACT-3      | 5'-ATCTTTGGGGTCCGTCAACT-3'     |
| IL-6          | 5'-GCTACCAAAGTGGATATAATCAGGA-3' | 5'-CCAGGTAGCTATGGTACTCCAGAA-3' |
| IL-10         | 5'-GCTCTTACTGACTGGCATGAG-3'     | 5'-CGCAGCTCTAGGAGCATGTG-3'     |
| NLRP3         | 5'-ATTACCCGCCGAGAAAGG-3'        | 5'-TCGCAGCAAAGATCCACACAG-3'    |
| GAPDH         | 5'-CCATCTCCAGGAGCGAGATC-3'      | 5'-GCCTTCTCCATGGTGGTGAA-3'     |

**Figure S1** Primer sequences for the amplification.
